# Supplementary material for: Temporal Dynamics of Host Molecular Responses Differentiate Symptomatic and Asymptomatic Influenza A Infection
Source: PubMed Central journal article supplement (PMC3161909; doi:10.1371/journal.pgen.1002234), 2011-08-25

Fig. S16

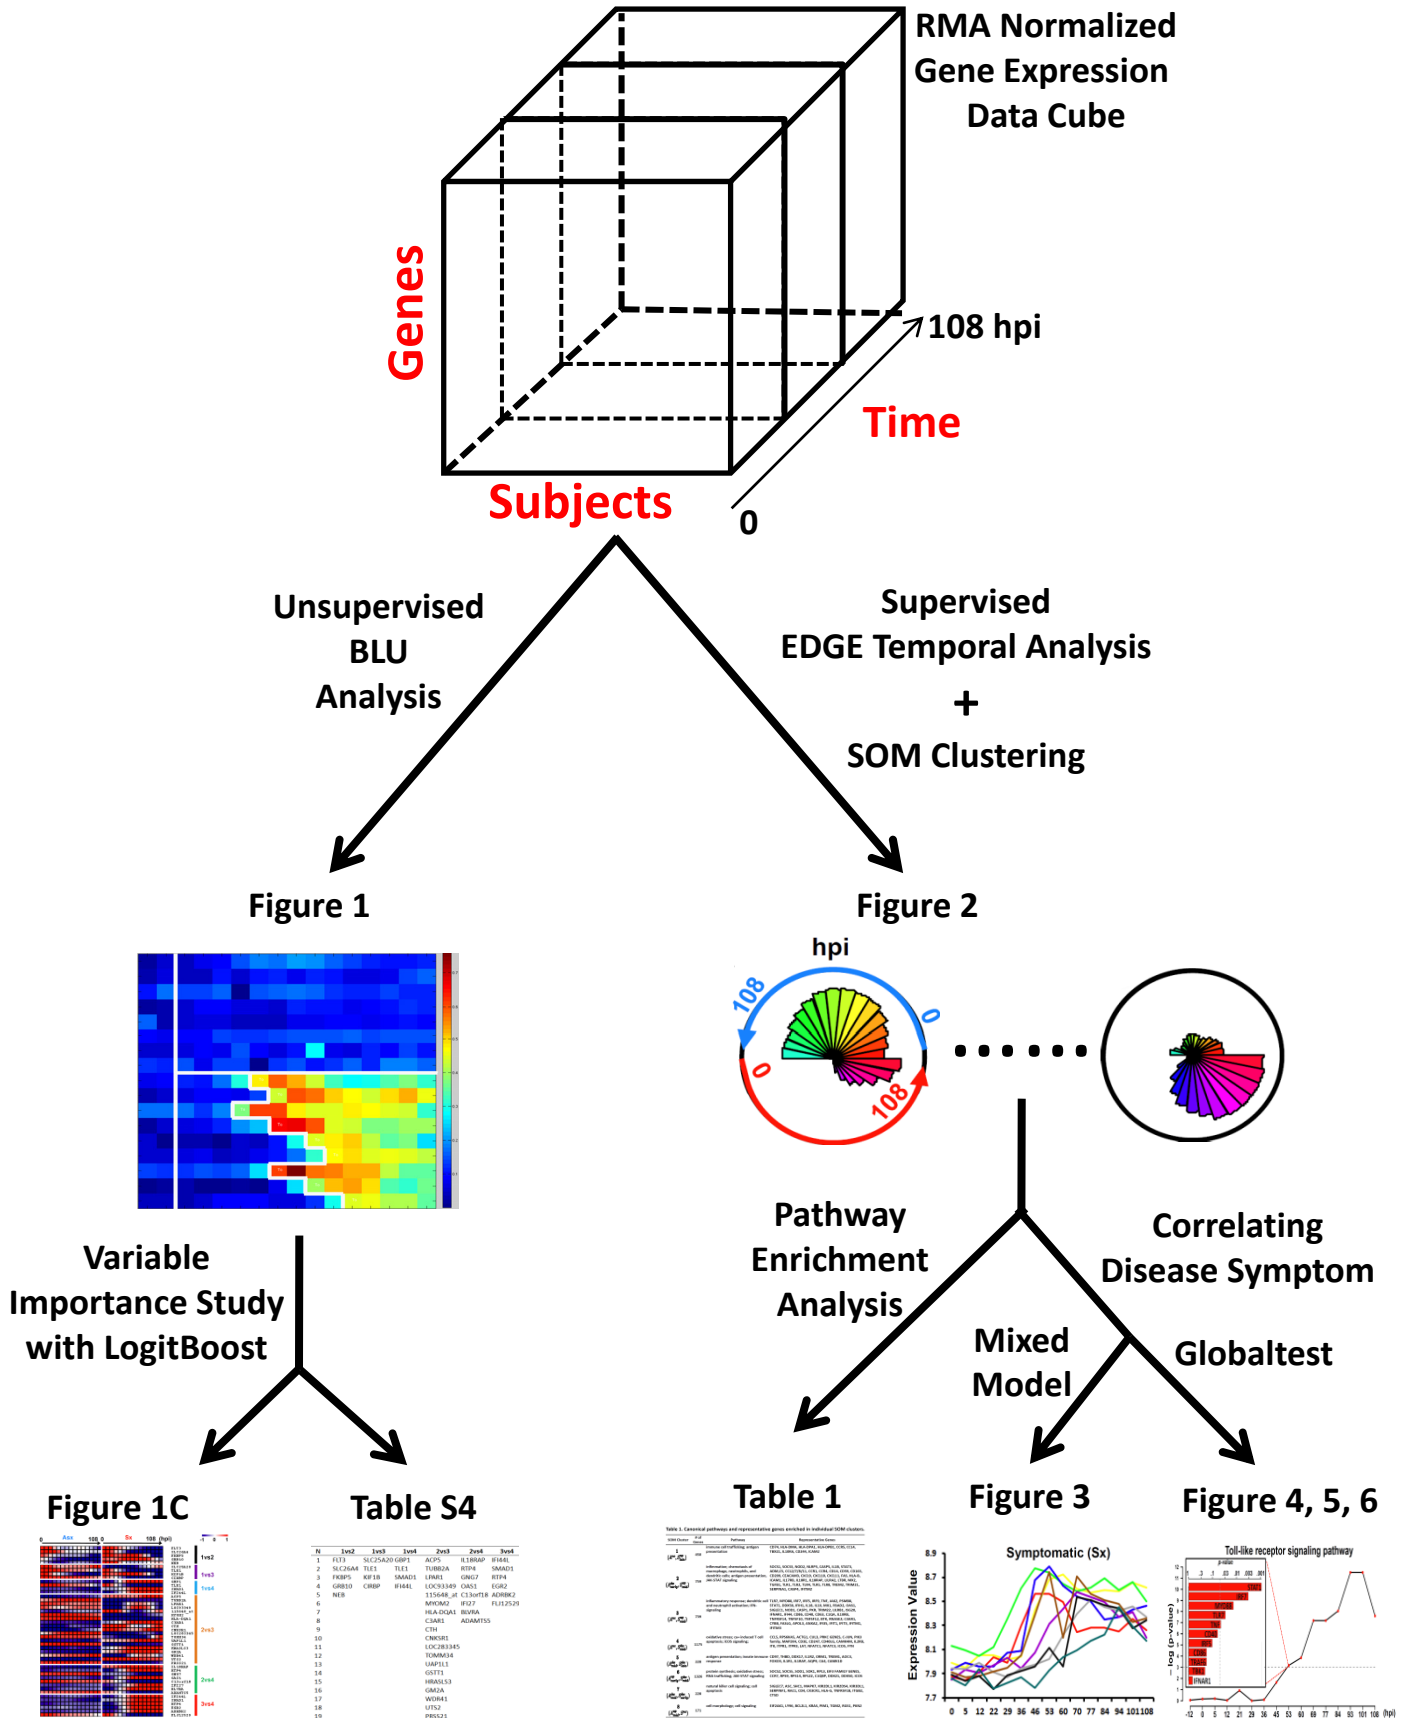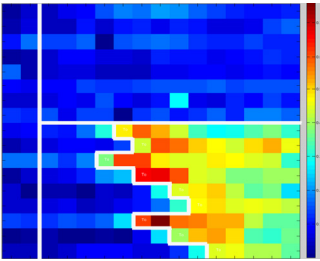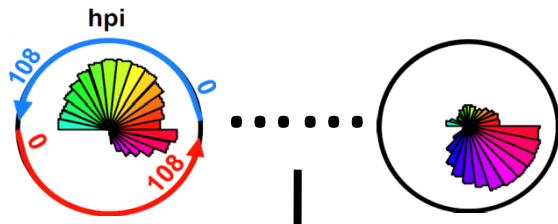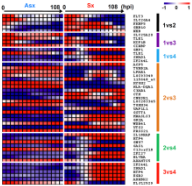

| N  | 108_0   | 108_4       | 108_8  | 108_12    | 108_16 | 108_20  | 108_24 |
|----|---------|-------------|--------|-----------|--------|---------|--------|
| 1  | TL11    | SCC2A2/SGPT | ACPI   | IL13RA1P  | IFNA1  |         |        |
| 2  | SLC26A4 | TL11        | TURBOA | RTM4      | SMAD1  |         |        |
| 3  | FEM1B   | KIF1B       | SMAD1  | IL13RA1   | GRB7   | RTM4    |        |
| 4  | GRB7    | CHBP        | IFNA1  | LOC13349  | GAS1   | EGF2    |        |
| 5  | NER     |             |        | 135946    | at     | CT10178 | ADIRF2 |
| 6  |         |             |        | MYO2A     | IFIT2  | FLJ2529 |        |
| 7  |         |             |        | HLA-DQA1  | BDNF   |         |        |
| 8  |         |             |        | C14orf1   | AGMAT5 |         |        |
| 9  |         |             |        | CTH       |        |         |        |
| 10 |         |             |        | C14orf1   |        |         |        |
| 11 |         |             |        | LOC103345 |        |         |        |
| 12 |         |             |        | TOMM24    |        |         |        |
| 13 |         |             |        | UAP1L1    |        |         |        |
| 14 |         |             |        | GSTT1     |        |         |        |
| 15 |         |             |        | HBA3L3    |        |         |        |
| 16 |         |             |        | GRIA3     |        |         |        |
| 17 |         |             |        | WDR41     |        |         |        |
| 18 |         |             |        | UTS2      |        |         |        |
| 19 |         |             |        | PRSS1     |        |         |        |

Table 1. Canonical pathways and representative genes enriched in individual SOM clusters.

| Cluster | Pathway                | Representative Genes                                                                                                                                                                                                                                                                                                                                                                                                                                                                                                                                                                                                                                                                                                                                                                                                                                                                                                                                                                                                                                             |
|---------|------------------------|------------------------------------------------------------------------------------------------------------------------------------------------------------------------------------------------------------------------------------------------------------------------------------------------------------------------------------------------------------------------------------------------------------------------------------------------------------------------------------------------------------------------------------------------------------------------------------------------------------------------------------------------------------------------------------------------------------------------------------------------------------------------------------------------------------------------------------------------------------------------------------------------------------------------------------------------------------------------------------------------------------------------------------------------------------------|
| 1       | IL-1 signaling pathway | IL1A, IL1B, IL1RN, IL1RI, IL1RII, IL1RAC1, IL1RAC2, IL1RAC3, IL1RAC4, IL1RAC5, IL1RAC6, IL1RAC7, IL1RAC8, IL1RAC9, IL1RAC10, IL1RAC11, IL1RAC12, IL1RAC13, IL1RAC14, IL1RAC15, IL1RAC16, IL1RAC17, IL1RAC18, IL1RAC19, IL1RAC20, IL1RAC21, IL1RAC22, IL1RAC23, IL1RAC24, IL1RAC25, IL1RAC26, IL1RAC27, IL1RAC28, IL1RAC29, IL1RAC30, IL1RAC31, IL1RAC32, IL1RAC33, IL1RAC34, IL1RAC35, IL1RAC36, IL1RAC37, IL1RAC38, IL1RAC39, IL1RAC40, IL1RAC41, IL1RAC42, IL1RAC43, IL1RAC44, IL1RAC45, IL1RAC46, IL1RAC47, IL1RAC48, IL1RAC49, IL1RAC50, IL1RAC51, IL1RAC52, IL1RAC53, IL1RAC54, IL1RAC55, IL1RAC56, IL1RAC57, IL1RAC58, IL1RAC59, IL1RAC60, IL1RAC61, IL1RAC62, IL1RAC63, IL1RAC64, IL1RAC65, IL1RAC66, IL1RAC67, IL1RAC68, IL1RAC69, IL1RAC70, IL1RAC71, IL1RAC72, IL1RAC73, IL1RAC74, IL1RAC75, IL1RAC76, IL1RAC77, IL1RAC78, IL1RAC79, IL1RAC80, IL1RAC81, IL1RAC82, IL1RAC83, IL1RAC84, IL1RAC85, IL1RAC86, IL1RAC87, IL1RAC88, IL1RAC89, IL1RAC90, IL1RAC91, IL1RAC92, IL1RAC93, IL1RAC94, IL1RAC95, IL1RAC96, IL1RAC97, IL1RAC98, IL1RAC99, IL1RAC100 |

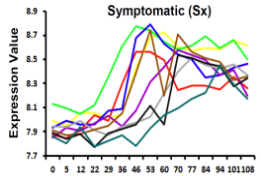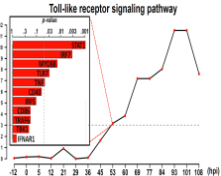

Supplement: pgen.1002234.s016.pdf [file pgen.1002234.s016.pdf]
