# Supplementary material for: Temporal Dynamics of Host Molecular Responses Differentiate Symptomatic and Asymptomatic Influenza A Infection
Source: PubMed Central journal article supplement (PMC3161909; doi:10.1371/journal.pgen.1002234), 2011-08-25

Fig. S9

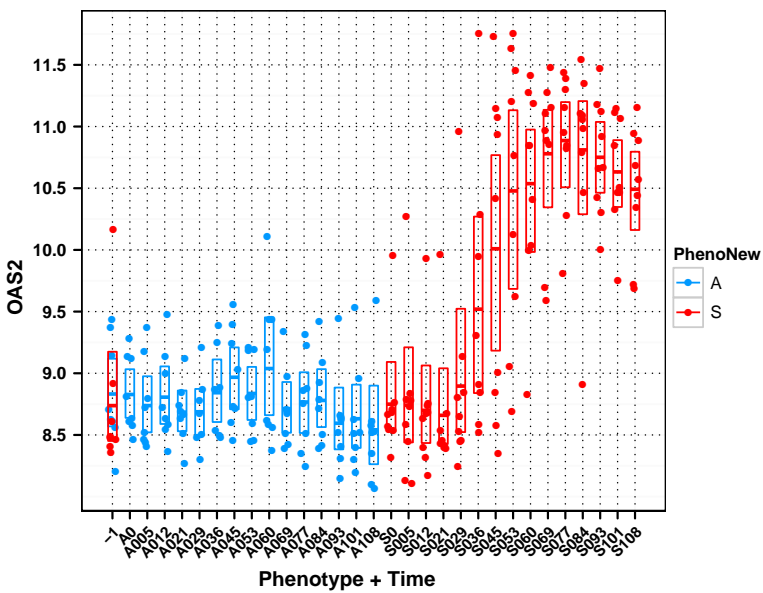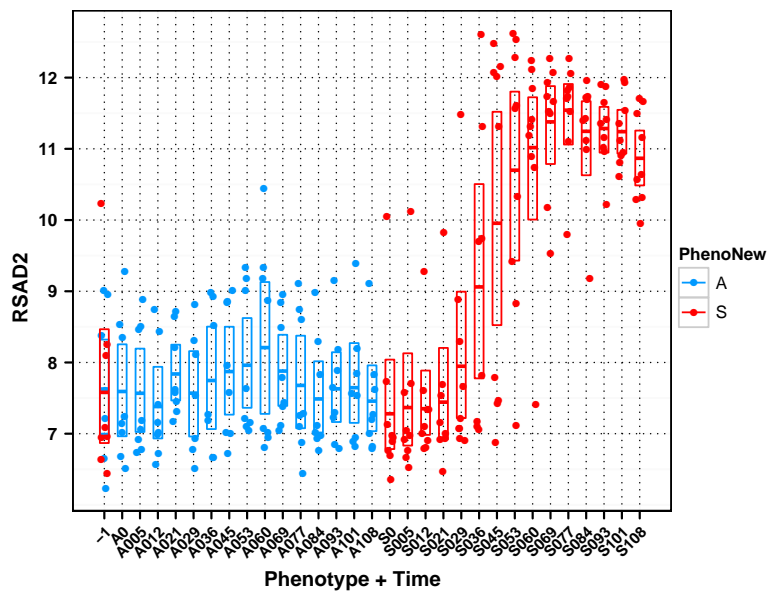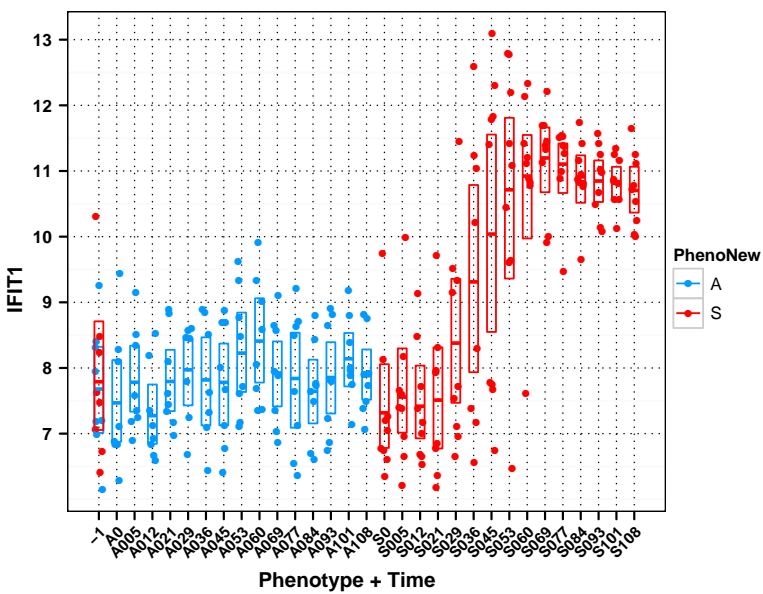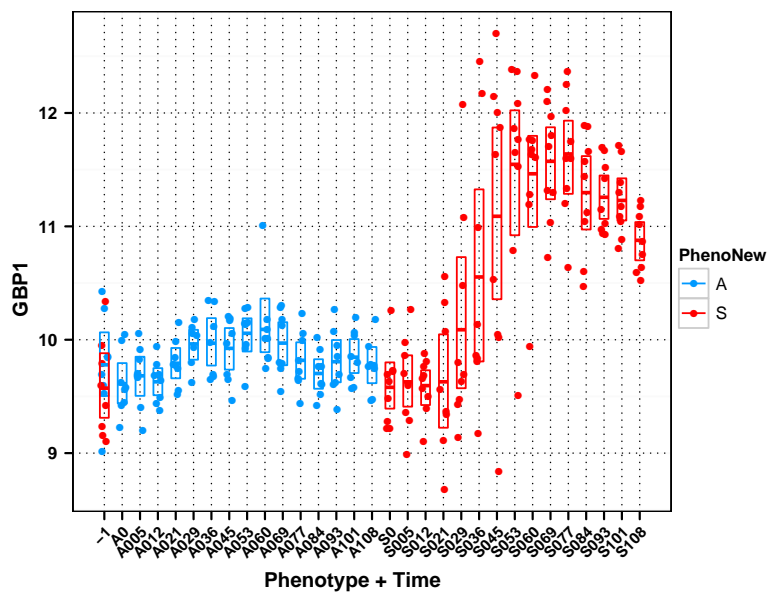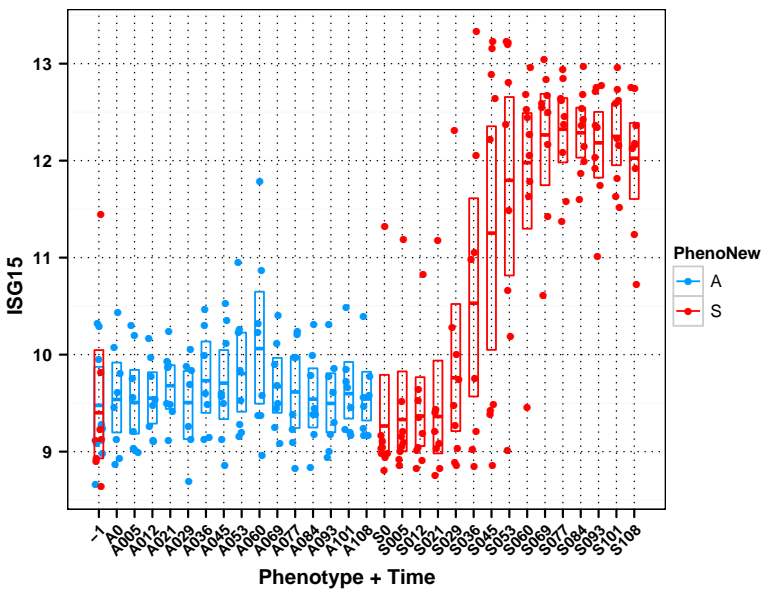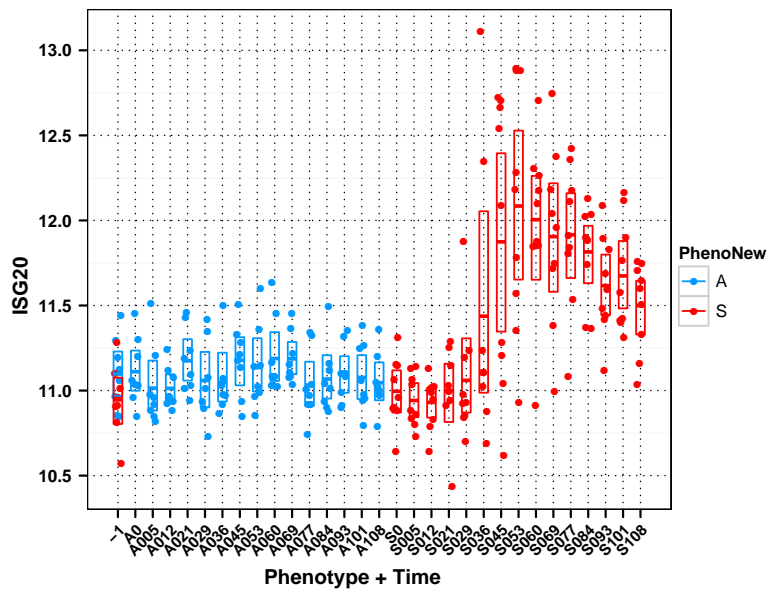

Supplement: pgen.1002234.s009.pdf [file pgen.1002234.s009.pdf]
