# Supplementary material for: Temporal Dynamics of Host Molecular Responses Differentiate Symptomatic and Asymptomatic Influenza A Infection
Source: PubMed Central journal article supplement (PMC3161909; doi:10.1371/journal.pgen.1002234), 2011-08-25
Supplement: pgen.1002234.s019.pdf [file pgen.1002234.s019.pdf]

**Table S1****A**

| CHARACTERISTICS                  | ALL SUBJECTS | ASYMPTOMATIC (Asx) | SYMPTOMATIC (Sx) |
|----------------------------------|--------------|--------------------|------------------|
| No. of subjects                  | 17           | 8                  | 9                |
| Female sex (%)                   | 8 (47%)      | 3 (38%)            | 5 (56%)          |
| Age (min, max)                   | 27 (22, 41)  | 28 (22, 41)        | 27 (22, 35)      |
| White race (%)                   | 14 (82%)     | 7 (88%)            | 7 (78%)          |
| Average symptom score (min, max) | 2 (0, 15)    | (0, 1)             | 4 (0, 15)        |
| Average peak symptom (min, max)  | 8 (0, 15)    | 0 (0, 1)           | 12 (8, 16)       |

**B**

| Class | Unique ID | Gender | Age (years) | Race/Ethnicity               |
|-------|-----------|--------|-------------|------------------------------|
| Asx   | flu011    | Female | 25          | Caucasian/White              |
|       | flu002    | Male   | 28          | Caucasian/White              |
|       | flu003    | Male   | 24          | Caucasian/White              |
|       | flu004    | Female | 23          | Caucasian/White              |
|       | flu009    | Male   | 24          | Caucasian/White              |
|       | flu014    | Female | 22          | Caucasian/White              |
|       | flu016    | Male   | 41          | Caucasian/White              |
|       | flu017    | Male   | 33          | Indian (Indian Subcontinent) |
| Sx    | flu013    | Female | 29          | Caucasian/White              |
|       | flu015    | Male   | 26          | Caucasian/White              |
|       | flu001    | Female | 29          | Black/Africa Origin          |
|       | flu005    | Female | 25          | Caucasian/White              |
|       | flu006    | Female | 28          | Mixed Ethnicity              |
|       | flu007    | Male   | 35          | Caucasian/White              |
|       | flu008    | Male   | 25          | Caucasian/White              |
|       | flu010    | Female | 22          | Caucasian/White              |
|       | flu012    | Male   | 27          | Caucasian/White              |
