# Supplementary material for: Temporal Dynamics of Host Molecular Responses Differentiate Symptomatic and Asymptomatic Influenza A Infection
Source: PubMed Central journal article supplement (PMC3161909; doi:10.1371/journal.pgen.1002234), 2011-08-25
Supplement: pgen.1002234.s020.pdf [file pgen.1002234.s020.pdf]

Table S2

**A**

| Virus Isolation (from nasal wash) |           |               |               |               |       |       |       |       |       |       |       |
|-----------------------------------|-----------|---------------|---------------|---------------|-------|-------|-------|-------|-------|-------|-------|
| Pheno                             | Unique ID | Day -2        | Day -1        | Day 0         | Day 1 | Day 2 | Day 3 | Day 4 | Day 5 | Day 6 | Day 7 |
| Asx                               | flu002    | none detected | none detected | none detected | <1.25 | <1.25 | <1.25 | <1.25 | 1.75  | <1.25 | 1.75  |
| Asx                               | flu003    | none detected | none detected | none detected | <1.25 | <1.25 | <1.25 | <1.25 | <1.25 | <1.25 | <1.25 |
| Asx                               | flu004    | none detected | none detected | none detected | <1.25 | <1.25 | <1.25 | 1.5   | <1.25 | <1.25 | 1.75  |
| Asx                               | flu009    | none detected | none detected | none detected | <1.25 | <1.25 | <1.25 | <1.25 | <1.25 | <1.25 | <1.25 |
| Asx                               | flu 011   | none detected | none detected | none detected | <1.25 | <1.25 | <1.25 | <1.25 | <1.25 | <1.25 | <1.25 |
| Asx                               | flu014    | none detected | none detected | none detected | <1.25 | <1.25 | <1.25 | <1.25 | <1.25 | 1.75  | <1.25 |
| Asx                               | flu016    | none detected | none detected | none detected | <1.25 | <1.25 | <1.25 | <1.25 | <1.25 | 1.75  | <1.25 |
| Asx                               | flu017    | none detected | none detected | none detected | <1.25 | <1.25 | <1.25 | <1.25 | <1.25 | <1.25 | <1.25 |
| Sx                                | flu001    | none detected | none detected | none detected | 4.25  | 4.25  | <1.25 | <1.25 | <1.25 | <1.25 | 1.75  |
| Sx                                | flu005    | none detected | none detected | none detected | <1.25 | 4.5   | 3.5   | <1.25 | <1.25 | <1.25 | 1.75  |
| Sx                                | flu006    | none detected | none detected | none detected | 3.75  | 5     | 3.25  | <1.25 | <1.25 | 1.75  | 1.75  |
| Sx                                | flu007    | none detected | none detected | none detected | <1.25 | 6.25  | 2.75  | <1.5  | <1.25 | <1.25 | 1.75  |
| Sx                                | flu008    | none detected | none detected | none detected | <1.25 | 4.75  | 1.75  | <1.25 | <1.25 | <1.25 | <1.25 |
| Sx                                | flu010    | none detected | none detected | none detected | <1.25 | <1.25 | 3.75  | <1.25 | 2.75  | <1.25 | <1.25 |
| Sx                                | flu012    | none detected | none detected | none detected | <1.25 | 5.01  | 5.01  | <1.25 | <1.25 | 2.75  | 1.75  |
| Sx                                | flu013    | none detected | none detected | none detected | <1.25 | 3.51  | 5.5   | 2.5   | <1.25 | <1.25 | <1.25 |
| Sx                                | flu015    | none detected | none detected | none detected | <1.25 | <1.25 | <1.25 | 3.75  | 4.5   | 4     | <1.25 |

**B**

| Serology |           |                        |                        |                              |                |
|----------|-----------|------------------------|------------------------|------------------------------|----------------|
| Pheno    | Unique ID | Pre-Screening visit    | Day -1                 | Day 28 (convalescent)        | Seroconversion |
| Asx      | flu002    | No detectable antibody | No detectable antibody | 40                           | Yes            |
| Asx      | flu003    | No detectable antibody | No detectable antibody | 160                          | Yes            |
| Asx      | flu004    | No detectable antibody | No detectable antibody | No detectable antibody       | No             |
| Asx      | flu009    | No detectable antibody | No detectable antibody | No detectable antibody       | No             |
| Asx      | flu 011   | No detectable antibody | No detectable antibody | Did not attend Day +28 visit | No             |
| Asx      | flu014    | No detectable antibody | No detectable antibody | No detectable antibody       | No             |
| Asx      | flu016    | No detectable antibody | No detectable antibody | <20                          | No             |
| Asx      | flu017    | No detectable antibody | No detectable antibody | No detectable antibody       | No             |
| Sx       | flu001    | No detectable antibody | No detectable antibody | 320                          | Yes            |
| Sx       | flu005    | No detectable antibody | No detectable antibody | 320                          | Yes            |
| Sx       | flu006    | No detectable antibody | No detectable antibody | 57                           | Yes            |
| Sx       | flu007    | No detectable antibody | No detectable antibody | <20                          | No             |
| Sx       | flu008    | No detectable antibody | No detectable antibody | Did not attend Day +28 visit | No             |
| Sx       | flu010    | No detectable antibody | No detectable antibody | Did not attend day +28 visit | No             |
| Sx       | flu012    | No detectable antibody | No detectable antibody | 80                           | Yes            |
| Sx       | flu013    | No detectable antibody | No detectable antibody | 40                           | Yes            |
| Sx       | flu015    | No detectable antibody | No detectable antibody | 20                           | No             |
