# Supplementary material for: Temporal Dynamics of Host Molecular Responses Differentiate Symptomatic and Asymptomatic Influenza A Infection
Source: PubMed Central journal article supplement (PMC3161909; doi:10.1371/journal.pgen.1002234), 2011-08-25
Supplement: pgen.1002234.s021.pdf [file pgen.1002234.s021.pdf]

Table S3

| SOM Cluster | Asymptomatic (ASX) | Symptomatic (SX) |
|-------------|--------------------|------------------|
| FLU1        | 0.2964             | < 0.0001         |
| FLU2        | < 0.0001           | < 0.0001         |
| FLU3        | 0.3924             | < 0.0001         |
| FLU4        | < 0.0001           | < 0.0001         |
| FLU5        | 0.0002             | < 0.0001         |
| FLU6        | 0.0002             | < 0.0001         |
| FLU7        | < 0.0001           | 0.1594           |
| FLU8        | < 0.0001           | 0.8264           |
