# Supplementary material for: Temporal Dynamics of Host Molecular Responses Differentiate Symptomatic and Asymptomatic Influenza A Infection
Source: PubMed Central journal article supplement (PMC3161909; doi:10.1371/journal.pgen.1002234), 2011-08-25
Supplement: pgen.1002234.s022.pdf [file pgen.1002234.s022.pdf]

**Table S4**

| <b>N</b> | <b>1vs2</b> | <b>1vs3</b> | <b>1vs4</b> | <b>2vs3</b> | <b>2vs4</b> | <b>3vs4</b> |
|----------|-------------|-------------|-------------|-------------|-------------|-------------|
| 1        | FLT3        | SLC25A20    | GBP1        | ACP5        | IL18RAP     | IFI44L      |
| 2        | SLC26A4     | TLE1        | TLE1        | TUBB2A      | RTP4        | SMAD1       |
| 3        | FKBP5       | KIF1B       | SMAD1       | LPAR1       | GNG7        | RTP4        |
| 4        | GRB10       | CIRBP       | IFI44L      | LOC93349    | OAS1        | EGR2        |
| 5        | NEB         |             |             | 115648_at   | C13orf18    | ADRBK2      |
| 6        |             |             |             | MYOM2       | IFI27       | FLJ12529    |
| 7        |             |             |             | HLA-DQA1    | BLVRA       |             |
| 8        |             |             |             | C3AR1       | ADAMTS5     |             |
| 9        |             |             |             | CTH         |             |             |
| 10       |             |             |             | CNKSR1      |             |             |
| 11       |             |             |             | LOC283345   |             |             |
| 12       |             |             |             | TOMM34      |             |             |
| 13       |             |             |             | UAP1L1      |             |             |
| 14       |             |             |             | GSTT1       |             |             |
| 15       |             |             |             | HRASLS3     |             |             |
| 16       |             |             |             | GM2A        |             |             |
| 17       |             |             |             | WDR41       |             |             |
| 18       |             |             |             | UTS2        |             |             |
| 19       |             |             |             | PRSS21      |             |             |
