# Supplementary material for: Temporal Dynamics of Host Molecular Responses Differentiate Symptomatic and Asymptomatic Influenza A Infection
Source: PubMed Central journal article supplement (PMC3161909; doi:10.1371/journal.pgen.1002234), 2011-08-25
Supplement: pgen.1002234.s023.pdf [file pgen.1002234.s023.pdf]

Table S5

| Influenza predictor genes<br>(Zaas, 2009) | Cluster designation<br>in this manuscript |
|-------------------------------------------|-------------------------------------------|
| RSAD2                                     | 3                                         |
| IFI44L                                    | 3                                         |
| SIGLEC1                                   | 3                                         |
| LAMP3                                     | 3                                         |
| IFIT1                                     | 3                                         |
| IFI44                                     | 3                                         |
| SERPING1                                  | 3                                         |
| IFI27                                     | 3                                         |
| ISG15                                     | 3                                         |
| IFI44                                     | 3                                         |
| HERC5                                     | 3                                         |
| LOC26010                                  | 3                                         |
| IFI6                                      | 3                                         |
| LOC727996                                 | N/A*                                      |
| IFIT3                                     | 3                                         |
| OAS3                                      | 3                                         |
| OASL                                      | 3                                         |
| 4-Sep                                     | 2                                         |
| XAF1                                      | 3                                         |
| OAS1                                      | 3                                         |
| LY6E                                      | 3                                         |
| MS4A4A                                    | 3                                         |
| SIGLEC1                                   | 3                                         |
| TNFAIP6                                   | 3                                         |
| CCL2                                      | 2                                         |
| OAS1                                      | 3                                         |
| MX1                                       | 3                                         |
| TNFAIP6                                   | 3                                         |
| RTP4                                      | 3                                         |
| OASL                                      | 3                                         |

\* This gene cannot be mapped due to public gene annotation issue.
