# Supplementary material for: Temporal Dynamics of Host Molecular Responses Differentiate Symptomatic and Asymptomatic Influenza A Infection
Source: PubMed Central journal article supplement (PMC3161909; doi:10.1371/journal.pgen.1002234), 2011-08-25
Supplement: pgen.1002234.s024.pdf [file pgen.1002234.s024.pdf]

**Table S6**

| Day | Pheno | Basophils (%) | Eosinophils (%) | Neutrophils (%) | Monocytes (%) | Lymphocytes (%) | <i>p</i> -value |
|-----|-------|---------------|-----------------|-----------------|---------------|-----------------|-----------------|
| -2  | Asx   | 0.35          | 1.65            | 58.06           | 7.24          | 31.37           | 0.9697          |
|     | Sx    | 0.34          | 0.95            | 59.12           | 6.06          | 32.98           |                 |
| 0   | Asx   | 0.47          | 2.54            | 54.77           | 7.28          | 32.80           | 0.8249          |
|     | Sx    | 0.52          | 1.46            | 56.48           | 7.52          | 35.73           |                 |
| 1   | Asx   | 0.50          | 3.07            | 49.99           | 8.03          | 38.43           | 0.9889          |
|     | Sx    | 0.57          | 1.88            | 51.93           | 9.03          | 36.71           |                 |
| 2   | Asx   | 0.61          | 2.69            | 52.47           | 8.60          | 34.97           | 0.1857          |
|     | Sx    | 0.56          | 0.99            | 65.82           | 8.49          | 21.73           |                 |
| 3   | Asx   | 0.42          | 3.08            | 48.79           | 8.69          | 38.75           | 0.0221          |
|     | Sx    | 0.60          | 1.53            | 63.82           | 13.06         | 20.41           |                 |
| 4   | Asx   | 0.61          | 3.43            | 49.71           | 8.31          | 37.48           | 0.5092          |
|     | Sx    | 0.65          | 1.75            | 53.30           | 14.95         | 30.36           |                 |
| 5   | Asx   | 0.53          | 3.44            | 49.49           | 8.13          | 38.21           | 0.5929          |
|     | Sx    | 0.47          | 1.82            | 50.85           | 12.72         | 32.37           |                 |
| 6   | Asx   | 0.62          | 3.37            | 47.66           | 8.95          | 38.92           | 0.8496          |
|     | Sx    | 0.62          | 1.43            | 44.77           | 11.72         | 41.15           |                 |
| 7   | Asx   | 0.74          | 3.46            | 48.77           | 8.45          | 36.88           | 0.8088          |
|     | Sx    | 0.43          | 1.89            | 45.07           | 9.59          | 43.33           |                 |
